# Supplementary material for: Myopic Heuristics for the Random Yield Problem
Source: Atypon-hosted journal article supplement (doi:10.1287/opre.47.5.713), 1999-10-01
Supplement: opre.47.5.713-sm.pdf [file opre.47.5.713-sm.pdf]

Online Companion for  
“Myopic Heuristics for the Random Yield Problem”

*Operations Research*  
Vol. 47, No. 5, September-October 1999

Srinivas Bollapragada  
Thomas E. Morton

Graduate School of Industrial Administration  
and The Robotics Institute  
Carnegie Mellon University  
Pittsburgh, Pennsylvania

©1999

**informs**

## Appendix

**Table A1: Stationary Problem (Demand: Normal, Yield: Normal)**

| $\rho_d$ | $\rho_\gamma$ | $\frac{p}{p+h}$ | Optimal Cost | % above optimal cost |         |       |       |
|----------|---------------|-----------------|--------------|----------------------|---------|-------|-------|
|          |               |                 |              | MULT                 | Newsboy | NLH-1 | NLH-2 |
| 0.2      | 0.1           | 0.85            | 7.0          | 0.4                  | 0.0     | 0.0   | 0.0   |
|          |               | 0.90            | 7.9          | 0.9                  | 0.0     | 0.0   | 0.0   |
|          |               | 0.95            | 9.3          | 1.8                  | 0.0     | 0.0   | 0.0   |
|          | 0.2           | 0.85            | 8.9          | 5.5                  | 0.0     | 0.5   | 0.3   |
|          |               | 0.90            | 10.1         | 9.1                  | 0.0     | 0.9   | 0.5   |
|          |               | 0.95            | 11.9         | 17.3                 | 0.1     | 1.6   | 0.8   |
|          | 0.3           | 0.85            | 11.6         | 12.0                 | 0.7     | 1.1   | 0.5   |
|          |               | 0.90            | 13.3         | 20.5                 | 1.2     | 1.8   | 0.8   |
|          |               | 0.95            | 15.8         | 41.0                 | 2.5     | 2.9   | 1.0   |
| 0.4      | 0.85          | 15.1            | 16.0         | 4.1                  | 0.9     | 0.2   |       |
|          | 0.90          | 17.4            | 28.2         | 7.0                  | 1.4     | 0.2   |       |
|          | 0.95          | 21.2            | 58.7         | 16.4                 | 2.4     | 0.0   |       |
| 0.4      | 0.1           | 0.85            | 12.9         | 0.0                  | 0.0     | 0.0   | 0.0   |
|          |               | 0.90            | 14.6         | 0.0                  | 0.0     | 0.0   | 0.0   |
|          |               | 0.95            | 17.1         | 0.1                  | 0.0     | 0.0   | 0.0   |
|          | 0.2           | 0.85            | 14.2         | 0.8                  | 0.1     | 0.1   | 0.0   |
|          |               | 0.90            | 16.0         | 1.3                  | 0.1     | 0.2   | 0.1   |
|          |               | 0.95            | 18.9         | 2.6                  | 0.1     | 0.5   | 0.1   |
|          | 0.3           | 0.85            | 16.3         | 2.5                  | 0.8     | 0.2   | 0.0   |
|          |               | 0.90            | 18.5         | 4.4                  | 1.1     | 0.5   | 0.1   |
|          |               | 0.95            | 22.0         | 8.8                  | 1.9     | 1.2   | 0.1   |
|          | 0.4           | 0.85            | 19.2         | 4.4                  | 3.9     | 0.2   | 0.0   |
|          |               | 0.90            | 22.0         | 8.0                  | 5.9     | 0.5   | 0.0   |
|          |               | 0.95            | 26.6         | 17.1                 | 12.1    | 1.4   | 0.0   |

**Table A2: Stationary Problem (Demand: Normal, Yield: Uniform)**

| $\rho_d$ | $\rho_\gamma$ | $\frac{p}{p+h}$ | Optimal Cost | % above optimal cost |       |       |
|----------|---------------|-----------------|--------------|----------------------|-------|-------|
|          |               |                 |              | MULT                 | NLH-1 | NLH-2 |
| 0.2      | 0.1           | 0.85            | 7.2          | 1.3                  | 0.2   | 0.1   |
|          |               | 0.90            | 8.0          | 2.6                  | 1.0   | 0.8   |
|          |               | 0.95            | 9.4          | 3.5                  | 1.4   | 1.0   |
|          | 0.2           | 0.85            | 9.1          | 9.5                  | 1.1   | 1.1   |
|          |               | 0.90            | 10.2         | 13.9                 | 1.8   | 1.5   |
|          |               | 0.95            | 11.8         | 25.7                 | 3.2   | 2.3   |
|          | 0.3           | 0.85            | 11.8         | 18.4                 | 2.1   | 0.7   |
|          |               | 0.90            | 13.2         | 29.5                 | 3.1   | 1.5   |
|          |               | 0.95            | 15.1         | 60.3                 | 6.4   | 2.7   |
|          | 0.4           | 0.85            | 15.7         | 21.8                 | 2.2   | 0.6   |
|          |               | 0.90            | 17.4         | 40.8                 | 3.3   | 1.1   |
|          |               | 0.95            | 20.5         | 82.2                 | 6.7   | 1.1   |
| 0.4      | 0.1           | 0.85            | 12.6         | 0.2                  | 0.1   | 0.0   |
|          |               | 0.90            | 14.2         | 0.2                  | 0.1   | 0.1   |
|          |               | 0.95            | 16.5         | 0.4                  | 0.1   | 0.1   |
|          | 0.2           | 0.85            | 13.8         | 1.3                  | 0.4   | 0.0   |
|          |               | 0.90            | 15.5         | 2.0                  | 0.5   | 0.5   |
|          |               | 0.95            | 18.0         | 3.6                  | 1.0   | 0.6   |
|          | 0.3           | 0.85            | 15.8         | 2.9                  | 0.4   | 0.1   |
|          |               | 0.90            | 17.8         | 5.6                  | 0.5   | 0.3   |
|          |               | 0.95            | 20.5         | 10.0                 | 1.4   | 0.4   |
|          | 0.4           | 0.85            | 18.8         | 3.0                  | 0.5   | 0.0   |
|          |               | 0.90            | 20.7         | 8.7                  | 0.7   | 0.0   |
|          |               | 0.95            | 24.6         | 16.6                 | 1.8   | 0.0   |

**Table A3: Stationary Problem (Demand: Normal, Yield: Beta)**

| $\rho_d$ | $\rho_\gamma$ | $\frac{p}{p+h}$ | Optimal Cost | % above optimal cost |       |       |
|----------|---------------|-----------------|--------------|----------------------|-------|-------|
|          |               |                 |              | MULT                 | NLH-1 | NLH-2 |
| 0.2      | 0.1           | 0.85            | 7.0          | 0.4                  | 0.0   | 0.0   |
|          |               | 0.90            | 7.9          | 0.6                  | 0.4   | 0.2   |
|          |               | 0.95            | 9.3          | 1.3                  | 0.6   | 0.4   |
|          | 0.2           | 0.85            | 8.9          | 5.6                  | 0.6   | 0.3   |
|          |               | 0.90            | 10.0         | 9.4                  | 1.1   | 0.7   |
|          |               | 0.95            | 11.7         | 17.4                 | 1.8   | 1.0   |
|          | 0.3           | 0.85            | 11.4         | 16.8                 | 2.2   | 1.2   |
|          |               | 0.90            | 12.7         | 28.0                 | 3.3   | 1.7   |
|          |               | 0.95            | 14.5         | 53.2                 | 5.2   | 2.2   |
|          | 0.4           | 0.85            | 14.4         | 31.4                 | 3.7   | 1.3   |
|          |               | 0.90            | 15.6         | 52.9                 | 5.5   | 1.8   |
|          |               | 0.95            | 17.4         | 103.7                | 10.3  | 2.5   |
| 0.4      | 0.1           | 0.85            | 12.2         | 0.2                  | 0.0   | 0.0   |
|          |               | 0.90            | 13.8         | 0.3                  | 0.0   | 0.0   |
|          |               | 0.95            | 16.2         | 0.4                  | 0.2   | 0.0   |
|          | 0.2           | 0.85            | 13.4         | 0.7                  | 0.0   | 0.0   |
|          |               | 0.90            | 15.2         | 1.2                  | 0.2   | 0.1   |
|          |               | 0.95            | 17.6         | 2.3                  | 0.4   | 0.1   |
|          | 0.3           | 0.85            | 15.4         | 3.1                  | 0.4   | 0.1   |
|          |               | 0.90            | 17.3         | 5.3                  | 0.9   | 0.3   |
|          |               | 0.95            | 20.0         | 9.9                  | 1.7   | 0.3   |
|          | 0.4           | 0.85            | 18.0         | 5.4                  | 0.8   | 0.0   |
|          |               | 0.90            | 19.9         | 10.8                 | 1.7   | 0.0   |
|          |               | 0.95            | 22.5         | 21.9                 | 3.3   | 0.1   |

**Table A4: Stationary Problem (Demand: Uniform, Yield: Normal)**

| $\rho_d$ | $\rho_\gamma$ | $\frac{p}{p+h}$ | Optimal Cost | % above optimal cost |       |       |
|----------|---------------|-----------------|--------------|----------------------|-------|-------|
|          |               |                 |              | MULT                 | NLH-1 | NLH-2 |
| 0.2      | 0.1           | 0.85            | 6.8          | 0.0                  | 0.0   | 0.0   |
|          |               | 0.90            | 7.5          | 0.4                  | 0.0   | 0.0   |
|          |               | 0.95            | 8.4          | 4.1                  | 0.3   | 0.1   |
|          | 0.2           | 0.85            | 8.8          | 2.9                  | 0.5   | 0.2   |
|          |               | 0.90            | 9.9          | 7.3                  | 1.1   | 0.6   |
|          |               | 0.95            | 11.4         | 24.3                 | 2.7   | 1.6   |
|          | 0.3           | 0.85            | 11.5         | 8.3                  | 1.3   | 0.7   |
|          |               | 0.90            | 13.1         | 17.4                 | 2.2   | 1.0   |
|          |               | 0.95            | 15.4         | 48.5                 | 3.8   | 1.5   |
|          | 0.4           | 0.85            | 14.5         | 11.7                 | 1.2   | 0.4   |
|          |               | 0.90            | 16.6         | 24.2                 | 1.7   | 0.5   |
|          |               | 0.95            | 20.1         | 64.5                 | 2.5   | 0.2   |
| 0.4      | 0.1           | 0.85            | 12.3         | 0.0                  | 0.0   | 0.0   |
|          |               | 0.90            | 13.3         | 0.0                  | 0.0   | 0.0   |
|          |               | 0.95            | 14.5         | 0.5                  | 0.1   | 0.0   |
|          | 0.2           | 0.85            | 13.8         | 0.2                  | 0.0   | 0.0   |
|          |               | 0.90            | 15.1         | 0.8                  | 0.2   | 0.0   |
|          |               | 0.95            | 17.1         | 5.1                  | 1.5   | 0.7   |
|          | 0.3           | 0.85            | 16.0         | 1.0                  | 0.2   | 0.0   |
|          |               | 0.90            | 17.8         | 3.3                  | 0.7   | 0.1   |
|          |               | 0.95            | 20.7         | 13.0                 | 2.4   | 0.9   |
|          | 0.4           | 0.85            | 18.6         | 2.0                  | 0.3   | 0.1   |
|          |               | 0.90            | 21.0         | 5.7                  | 0.9   | 0.3   |
|          |               | 0.95            | 25.1         | 20.2                 | 1.8   | 0.5   |

**Table A5: Stationary Problem (Demand: Uniform, Yield: Uniform)**

| $\rho_d$ | $\rho_\gamma$ | $\frac{p}{p+h}$ | Optimal Cost | % above optimal cost |       |       |
|----------|---------------|-----------------|--------------|----------------------|-------|-------|
|          |               |                 |              | MULT                 | NLH-1 | NLH-2 |
| 0.2      | 0.1           | 0.85            | 6.9          | 0.0                  | 0.0   | 0.0   |
|          |               | 0.90            | 7.6          | 0.7                  | 0.0   | 0.0   |
|          |               | 0.95            | 8.4          | 5.6                  | 0.5   | 0.3   |
|          | 0.2           | 0.85            | 8.9          | 4.3                  | 0.9   | 0.7   |
|          |               | 0.90            | 9.9          | 10.1                 | 1.8   | 1.1   |
|          |               | 0.95            | 11.1         | 31.5                 | 3.7   | 2.2   |
|          | 0.3           | 0.85            | 11.6         | 12.6                 | 2.2   | 1.3   |
|          |               | 0.90            | 12.9         | 25.4                 | 3.7   | 1.9   |
|          |               | 0.95            | 14.6         | 66.7                 | 6.7   | 3.0   |
|          | 0.4           | 0.85            | 15.2         | 18.3                 | 1.8   | 0.7   |
|          |               | 0.90            | 17.0         | 36.1                 | 3.1   | 0.9   |
|          |               | 0.95            | 19.6         | 91.8                 | 6.8   | 1.1   |
| 0.4      | 0.1           | 0.85            | 12.4         | 0.0                  | 0.0   | 0.0   |
|          |               | 0.90            | 13.3         | 0.0                  | 0.0   | 0.0   |
|          |               | 0.95            | 14.5         | 0.7                  | 0.3   | 0.2   |
|          | 0.2           | 0.85            | 13.9         | 0.3                  | 0.1   | 0.0   |
|          |               | 0.90            | 15.3         | 1.3                  | 0.4   | 0.1   |
|          |               | 0.95            | 17.1         | 6.9                  | 2.0   | 1.1   |
|          | 0.3           | 0.85            | 16.2         | 1.6                  | 0.4   | 0.1   |
|          |               | 0.90            | 18.0         | 4.6                  | 1.1   | 0.3   |
|          |               | 0.95            | 20.4         | 17.8                 | 3.5   | 1.4   |
|          | 0.4           | 0.85            | 19.4         | 3.4                  | 0.4   | 0.0   |
|          |               | 0.90            | 21.7         | 8.9                  | 1.4   | 0.2   |
|          |               | 0.95            | 25.2         | 29.6                 | 3.6   | 0.5   |

**Table A6: Stationary Problem (Demand: Uniform, Yield: Beta)**

| $\rho_d$ | $\rho_\gamma$ | $\frac{p}{p+h}$ | Optimal Cost | % above optimal cost |       |       |
|----------|---------------|-----------------|--------------|----------------------|-------|-------|
|          |               |                 |              | MULT                 | NLH-1 | NLH-2 |
| 0.2      | 0.1           | 0.85            | 6.8          | 0.0                  | 0.0   | 0.0   |
|          |               | 0.90            | 7.5          | 0.1                  | 0.0   | 0.0   |
|          |               | 0.95            | 8.4          | 3.3                  | 0.3   | 0.1   |
|          | 0.2           | 0.85            | 8.9          | 2.9                  | 0.6   | 0.3   |
|          |               | 0.90            | 9.9          | 7.7                  | 1.3   | 0.9   |
|          |               | 0.95            | 11.3         | 25.3                 | 2.9   | 1.7   |
|          | 0.3           | 0.85            | 11.5         | 11.8                 | 2.2   | 1.2   |
|          |               | 0.90            | 12.7         | 24.2                 | 3.4   | 1.9   |
|          |               | 0.95            | 14.3         | 63.9                 | 6.3   | 2.8   |
|          | 0.4           | 0.85            | 14.5         | 24.4                 | 3.5   | 1.2   |
|          |               | 0.90            | 15.7         | 47.0                 | 5.7   | 1.6   |
|          |               | 0.95            | 17.3         | 116.2                | 11.2  | 2.1   |
| 0.4      | 0.1           | 0.85            | 12.4         | 0.0                  | 0.0   | 0.0   |
|          |               | 0.90            | 13.3         | 0.0                  | 0.0   | 0.0   |
|          |               | 0.95            | 14.5         | 0.4                  | 0.1   | 0.1   |
|          | 0.2           | 0.85            | 13.8         | 0.1                  | 0.0   | 0.0   |
|          |               | 0.90            | 15.2         | 0.8                  | 0.2   | 0.0   |
|          |               | 0.95            | 17.0         | 5.3                  | 1.6   | 0.8   |
|          | 0.3           | 0.85            | 16.1         | 1.3                  | 0.3   | 0.1   |
|          |               | 0.90            | 17.9         | 4.3                  | 1.1   | 0.3   |
|          |               | 0.95            | 20.2         | 16.7                 | 3.3   | 1.5   |
|          | 0.4           | 0.85            | 19.1         | 4.0                  | 0.5   | 0.0   |
|          |               | 0.90            | 21.1         | 11.1                 | 1.9   | 0.5   |
|          |               | 0.95            | 23.8         | 34.5                 | 4.9   | 0.9   |

**Table A7: Non-Stationary Problem (Amplitude=0.25)**

| $\rho_d$ | $\rho_\gamma$ | $\frac{p}{p+h}$ | Optimal Cost | % above optimal cost |         |       |       |
|----------|---------------|-----------------|--------------|----------------------|---------|-------|-------|
|          |               |                 |              | MULT                 | Newsboy | NLH-1 | NLH-2 |
| 0.2      | 0.1           | 0.85            | 7.2          | 1.3                  | 0.1     | 0.5   | 0.4   |
|          |               | 0.90            | 8.1          | 2.3                  | 0.1     | 1.0   | 0.8   |
|          |               | 0.95            | 9.6          | 4.5                  | 0.1     | 2.1   | 1.8   |
|          | 0.2           | 0.85            | 9.5          | 6.7                  | 0.4     | 1.6   | 1.1   |
|          |               | 0.90            | 10.8         | 11.5                 | 0.7     | 3.0   | 2.1   |
|          |               | 0.95            | 12.9         | 23.5                 | 1.4     | 6.8   | 4.8   |
|          | 0.3           | 0.85            | 12.8         | 12.0                 | 3.1     | 1.9   | 0.9   |
|          |               | 0.90            | 14.8         | 21.1                 | 5.1     | 3.6   | 1.9   |
|          |               | 0.95            | 18.1         | 43.9                 | 10.8    | 8.2   | 4.5   |
| 0.4      | 0.85          | 16.9            | 14.6         | 11.1                 | 1.5     | 0.5   |       |
|          | 0.90          | 19.9            | 26.1         | 19.0                 | 2.8     | 0.8   |       |
|          | 0.95          | 25.3            | 55.0         | 41.0                 | 6.4     | 1.8   |       |
| 0.4      | 0.1           | 0.85            | 13.0         | 0.2                  | 0.0     | 0.1   | 0.1   |
|          |               | 0.90            | 14.7         | 0.3                  | 0.0     | 0.2   | 0.1   |
|          |               | 0.95            | 17.3         | 0.6                  | 0.1     | 0.4   | 0.3   |
|          | 0.2           | 0.85            | 14.7         | 1.1                  | 0.4     | 0.4   | 0.2   |
|          |               | 0.90            | 16.7         | 2.1                  | 0.5     | 0.8   | 0.5   |
|          |               | 0.95            | 19.8         | 4.8                  | 0.9     | 2.3   | 1.4   |
|          | 0.3           | 0.85            | 17.4         | 2.7                  | 2.4     | 0.5   | 0.1   |
|          |               | 0.90            | 19.9         | 5.2                  | 3.8     | 1.4   | 0.5   |
|          |               | 0.95            | 24.1         | 11.8                 | 7.6     | 3.9   | 1.8   |
| 0.4      | 0.85          | 20.9            | 4.2          | 9.2                  | 0.5     | 0.1   |       |
|          | 0.90          | 24.4            | 8.1          | 15.1                 | 1.2     | 0.2   |       |
|          | 0.95          | 30.5            | 18.3         | 31.7                 | 3.8     | 0.7   |       |

**Table A8: Non-Stationary Problem (Amplitude=0.5)**

| $\rho_d$ | $\rho_\gamma$ | $\frac{p}{p+h}$ | Optimal Cost | % above optimal cost |         |       |       |
|----------|---------------|-----------------|--------------|----------------------|---------|-------|-------|
|          |               |                 |              | MULT                 | Newsboy | NLH-1 | NLH-2 |
| 0.2      | 0.1           | 0.85            | 7.2          | 1.3                  | 0.0     | 0.5   | 0.4   |
|          |               | 0.90            | 8.1          | 2.3                  | 0.1     | 1.0   | 0.8   |
|          |               | 0.95            | 9.6          | 4.5                  | 0.1     | 2.2   | 1.8   |
|          | 0.2           | 0.85            | 9.5          | 6.7                  | 0.3     | 1.6   | 1.1   |
|          |               | 0.90            | 10.8         | 11.6                 | 0.6     | 3.1   | 2.2   |
|          |               | 0.95            | 12.9         | 23.7                 | 1.2     | 7.0   | 5.0   |
|          | 0.3           | 0.85            | 12.8         | 12.1                 | 2.8     | 2.0   | 1.0   |
|          |               | 0.90            | 14.7         | 21.3                 | 4.6     | 3.8   | 2.0   |
|          |               | 0.95            | 18.0         | 44.3                 | 9.7     | 8.5   | 4.8   |
| 0.4      | 0.85          | 16.9            | 14.7         | 10.3                 | 1.7     | 0.6   |       |
|          | 0.90          | 19.8            | 26.4         | 17.6                 | 3.0     | 0.9   |       |
|          | 0.95          | 25.2            | 55.5         | 38.6                 | 6.9     | 2.1   |       |
| 0.4      | 0.1           | 0.85            | 13.0         | 0.2                  | 0.0     | 0.1   | 0.1   |
|          |               | 0.90            | 14.7         | 0.3                  | 0.0     | 0.2   | 0.1   |
|          |               | 0.95            | 17.3         | 0.6                  | 0.1     | 0.4   | 0.3   |
|          | 0.2           | 0.85            | 14.7         | 1.1                  | 0.3     | 0.4   | 0.2   |
|          |               | 0.90            | 16.7         | 2.2                  | 0.4     | 0.9   | 0.5   |
|          |               | 0.95            | 19.8         | 4.9                  | 0.7     | 2.4   | 1.5   |
|          | 0.3           | 0.85            | 17.3         | 2.8                  | 2.2     | 0.6   | 0.2   |
|          |               | 0.90            | 19.9         | 5.3                  | 3.4     | 1.5   | 0.6   |
|          |               | 0.95            | 24.0         | 12.0                 | 6.8     | 4.1   | 2.0   |
| 0.4      | 0.85          | 20.9            | 4.3          | 8.6                  | 0.6     | 0.2   |       |
|          | 0.90          | 24.3            | 8.2          | 14.0                 | 1.4     | 0.2   |       |
|          | 0.95          | 30.4            | 18.6         | 29.1                 | 4.2     | 1.0   |       |
